# Supplementary material for: High-efficiency ternary nonfullerene organic solar cells fabricated with a near infrared acceptor enhancing exciton utilization and extending absorption
Source: Royal Society of Chemistry journal article supplement (doi:10.1039/c9tc03534f), 2019-01-01
Supplement: c9tc03534f1.pdf [file c9tc03534f1.pdf]

*Supporting Information for*

**High-Efficiency Ternary Nonfullerene Organic Solar Cells Enabled by a Near  
Infrared Acceptor Enhancing Exciton Utilization and Extending Absorption**

Bei Wang,<sup>a,b</sup> Yingying Fu,<sup>a</sup> Qingqing Yang,<sup>\*,a</sup> Jiang Wu,<sup>a,b</sup> He Liu,<sup>a,b</sup> Hao Tang,<sup>a,b</sup> and Zhiyuan Xie<sup>\*,a,b</sup>

<sup>a</sup> State Key Laboratory of Polymer Physics and Chemistry, Changchun Institute of Applied Chemistry,  
Chinese Academy of Sciences, Changchun 130022, P. R. China

<sup>b</sup> School of Applied Chemistry and Engineering, University of Science and Technology of China, Hefei  
230026, P. R. China

\* Corresponding authors.

E-mail address: qqyang@ciac.ac.cn (Q.-Q. Yang), xiezy\_n@ciac.ac.cn (Z.-Y. Xie).

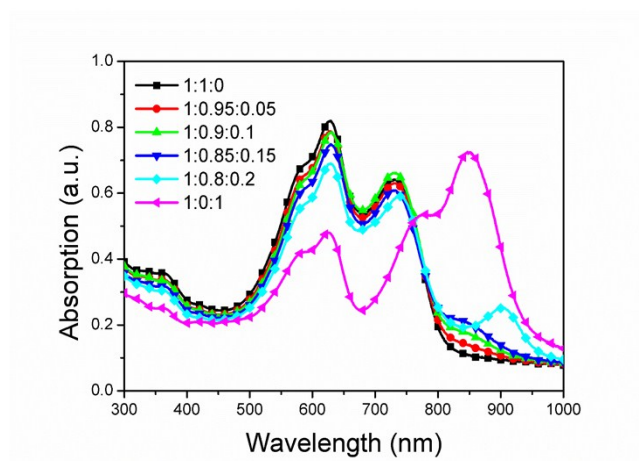

**Figure S1.** The absorption spectra of the PBDB-TF:IT-4F:O6T-4F ternary blends with different IT-4F:O6T-4F ratios. The donor/acceptor weight ratio is fixed at 1:1.

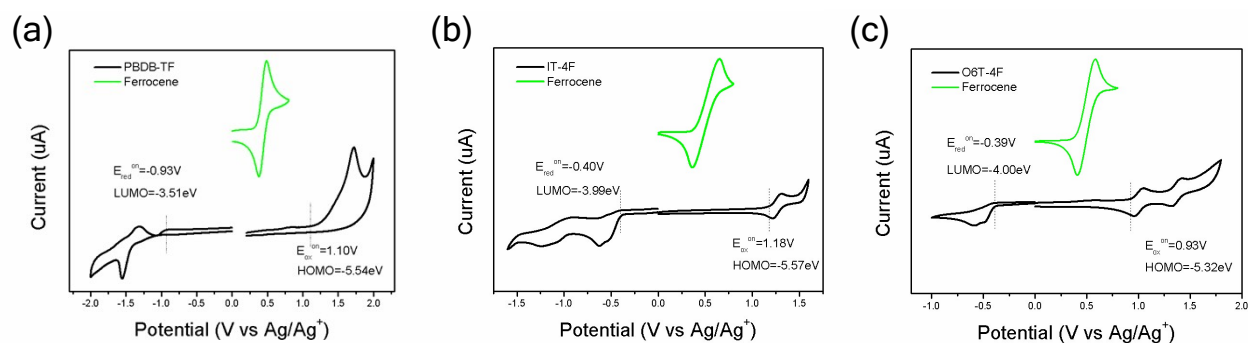

**Figure S2.** CV plots of (a) PBDB-TF, (b) IT-4F and (c) O6T-4F, respectively, from which the HOMO and LUMO levels of the respective materials are calculated.

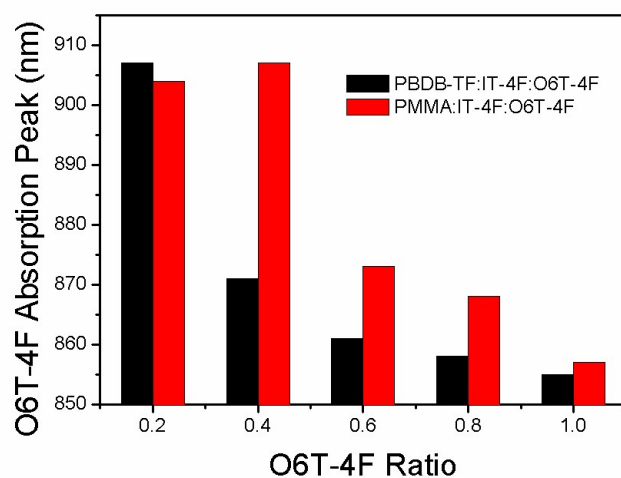

**Figure S3.** The O6T-4F absorption peak shifts with the IT-4F:O6T-4F ratio in PBDB-TF:IT-4F:O6T-4F and PMMA:IT-4F:O6T-4F films. The ratio between PBDB-TF (or PMMA) and acceptors is fixed at 1:1.

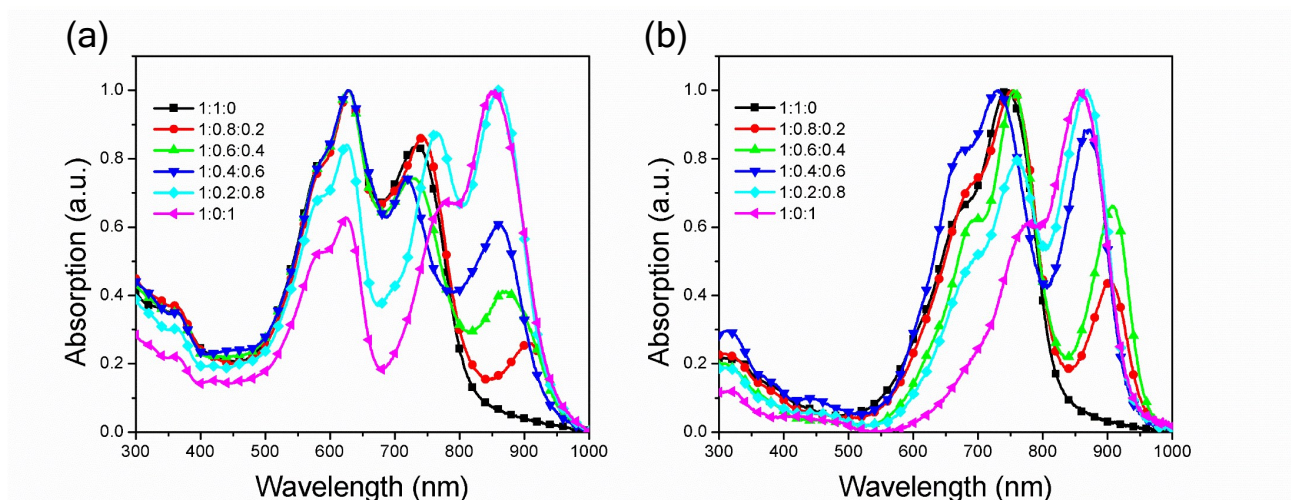

**Figure S4.** Normalized absorption spectra of (a) PBDB-TF:IT-4F:O6T-4F blend films and (b) PMMA:IT-4F:O6T-4F blend films.

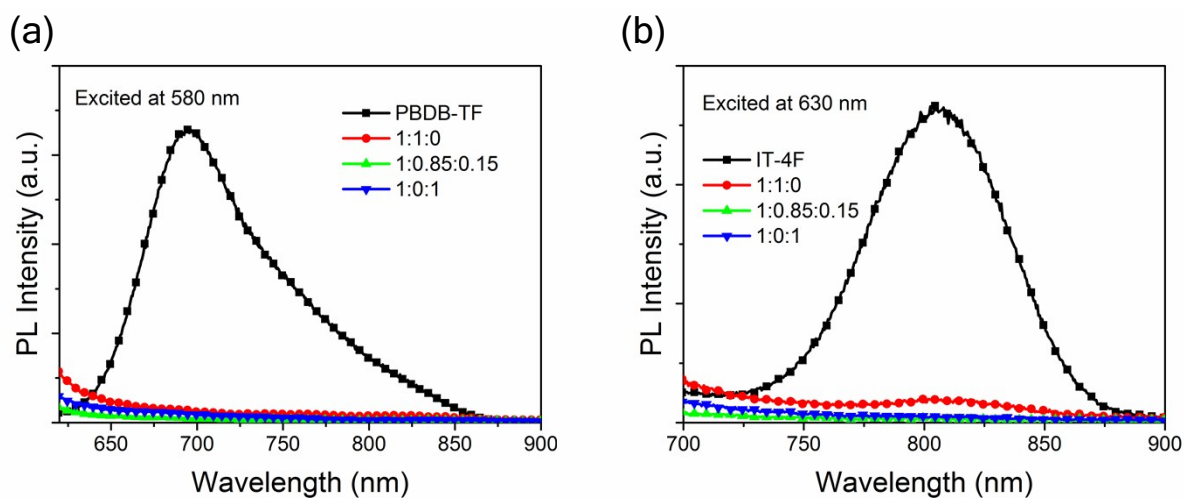

**Figure S5.** Photoluminescent quenching of (a) PBDB-TF donor (excited at 580 nm) and (b) IT-4F acceptor (excited at 630 nm) in binary and ternary blend films (PBDB-TF:IT-4F:O6T-4F=1:1:0, 1:0.85:0.15, 1:0:1).

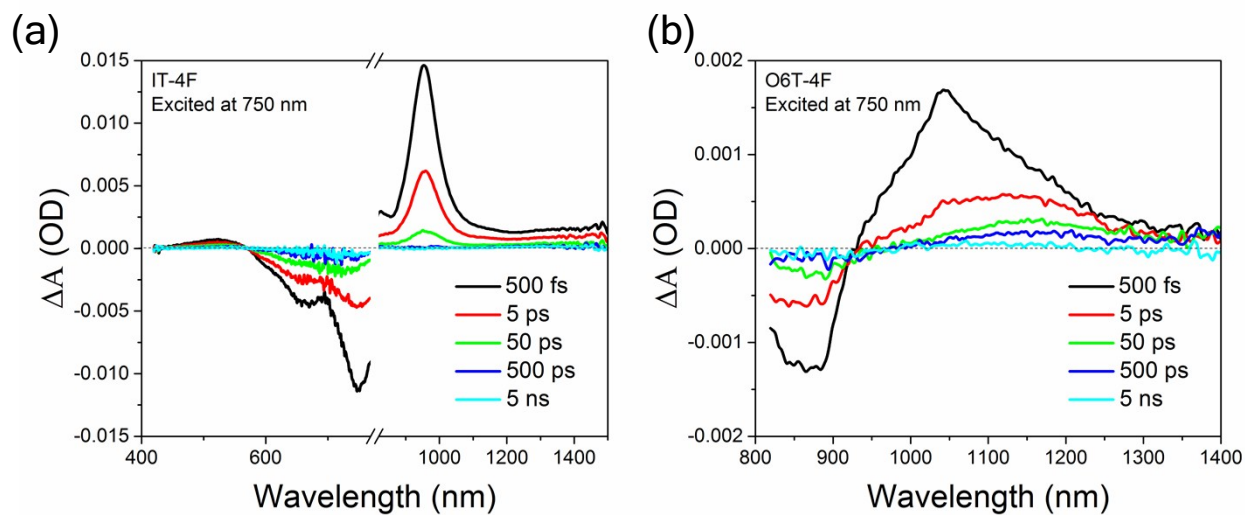

**Figure S6.** TA spectra of neat IT-4F and O6T-4F films pumped at 750 nm with 10 nJ pulse<sup>-1</sup>.

**Table S1.** Detailed photovoltaic performance of the OSCs based on the PBDB-TF:IT-4F:O6T-4F blend active layers with various IT-4F:O6T-4F ratios.

| PBDB-TF:IT-4F:O6T-4F<br>(w/w/w) | V <sub>OC</sub><br>[V] | J <sub>sc</sub><br>[mA cm <sup>-2</sup> ] | FF    | PCE<br>[%] |
|---------------------------------|------------------------|-------------------------------------------|-------|------------|
| 1:1:0                           | 0.82                   | 19.72                                     | 0.740 | 11.97      |
| 1:0.8:0.2                       | 0.81                   | 21.33                                     | 0.699 | 12.08      |
| 1:0.6:0.4                       | 0.81                   | 19.24                                     | 0.614 | 9.57       |
| 1:0.4:0.6                       | 0.80                   | 18.73                                     | 0.562 | 8.42       |
| 1:0.2:0.8                       | 0.78                   | 17.24                                     | 0.576 | 7.75       |
| 1:0:1                           | 0.77                   | 16.43                                     | 0.547 | 6.92       |
